# Supplementary material for: Socio-demographic factors related to children’s knowledge about their rights to healthcare services in transitional Albania
Source: Frontiers journal article supplement (doi:10.3389/fpubh.2024.1391265), 2024-12-11
Supplement: Data_Sheet_1.pdf [file Data_Sheet_1.pdf]

## Questionnaire

*Do you know your rights to healthcare services?*

Yes ☐

No ☐

*Do you know where to receive healthcare services?*

Yes ☐

No ☐

*Are you aware of the existence of healthcare facilities in your living area?*

Yes ☐

No ☐

*Have you ever visited/consulted a health professional other than complying with the vaccination calendar?*

Yes ☐

No ☐

### **Socio-demographic factors**

*Gender:*

Boy ☐

Girl ☐

*Age:*

12 years ☐

13 years ☐

14 years ☐

15 years ☐

*Place of residence:*

Urban area ☐

Rural area ☐

*Ethnicity:*

Ethnic Albanian ☐

Roma/Egyptian community ☐

***Maternal education:***

Low ☐

Middle ☐

High ☐

***Family economic situation:***

Not poor ☐

Poor ☐

Very poor ☐
